# Supplementary material for: The reasons for ligand-dependent quantum yields and spectroscopic properties of platinum(ii) complexes based on tetradentate O^N^C^N ligands: a DFT and TD-DFT study
Source: Royal Society of Chemistry journal article supplement (doi:10.1039/c3dt52616j), 2013-11-11
Supplement: c3dt52616j.pdf [file c3dt52616j.pdf]

## Supporting Information

**Table S1** The optimized ground-state geometries of complex **1** obtained by different methods

|                    | B3LYP  | PEB0   | M062X  |
|--------------------|--------|--------|--------|
| Bond length (Å)    |        |        |        |
| Pt-N1              | 2.018  | 1.998  | 2.022  |
| Pt-C1              | 1.916  | 1.902  | 1.901  |
| Pt-N2              | 2.075  | 2.047  | 2.085  |
| Pt-O1              | 2.085  | 2.064  | 2.103  |
| Bond angle (°)     |        |        |        |
| C1-Pt-N2           | 79.96  | 80.25  | 80.05  |
| C1-Pt-N1           | 82.75  | 82.79  | 82.72  |
| N1-Pt-O1           | 94.51  | 95.15  | 94.07  |
| N2-Pt-O1           | 102.76 | 101.79 | 103.14 |
| C1-Pt-O1           | 176.65 | 177.17 | 175.85 |
| Dihedral angle (°) |        |        |        |
| N2-Pt-N1-C1        | 0.549  | 0.819  | -0.837 |
| O1-N1-C1-N2        | 1.205  | 1.147  | -1.624 |

**Table S2** Selected optimized geometric parameters of the ground-state and the lowest-lying triplet excited state for **1** at the different level

|                    | B3LYP          | B3LYP(PCM)     | TD-B3LYP       | TD-B3LYP(PCM)  | B3LYP          |
|--------------------|----------------|----------------|----------------|----------------|----------------|
|                    | S <sub>0</sub> | S <sub>0</sub> | T <sub>1</sub> | T <sub>1</sub> | T <sub>1</sub> |
| Bond lengths (Å)   |                |                |                |                |                |
| Pt-N1              | 2.018          | 2.027(0.009)   | 2.012          | 2.012(0.000)   | 2.006(0.006)   |
| Pt-C1              | 1.916          | 1.919(0.003)   | 1.918          | 1.920(0.002)   | 1.919(0.001)   |
| Pt-N2              | 2.075          | 2.083(0.008)   | 2.077          | 2.091(0.014)   | 2.082(0.005)   |
| Pt-O1              | 2.085          | 2.106(0.021)   | 2.195          | 2.161(0.034)   | 2.130(0.065)   |
| Bond angles (°)    |                |                |                |                |                |
| C1-Pt-N2           | 79.96          | 79.85(0.11)    | 80.21          | 80.03(0.18)    | 80.19(0.02)    |
| C1-Pt-N1           | 82.75          | 82.58(0.17)    | 82.78          | 82.87(0.09)    | 83.02(0.24)    |
| N1-Pt-O1           | 94.51          | 93.85(0.3)     | 91.16          | 91.20(0.04)    | 91.93(0.77)    |
| N2-Pt-O1           | 102.76         | 103.71(0.95)   | 105.85         | 105.96(0.11)   | 104.87(0.98)   |
| C1-Pt-O1           | 176.65         | 175.71(0.94)   | 173.49         | 173.68(0.19)   | 174.78(1.29)   |
| Dihedral angle (°) |                |                |                |                |                |
| N2-Pt-N1-C1        | 0.549          | -0.002(0.551)  | -1.815         | -2.940(1.125)  | -1.648(0.167)  |
| O1-N1-C1-N2        | 1.205          | 1.667(0.462)   | 2.182          | 2.310(0.128)   | 1.324(0.858)   |

**Table S3** Molecular orbital compositions in the ground state for **1** at the DFT/B3LYP level

| MO  | Energy (eV) | Contribution (%) |    |      |      |      |      |      | Assign                        |
|-----|-------------|------------------|----|------|------|------|------|------|-------------------------------|
|     |             | Pt               | O  | ph-a | ph-b | ph-c | py-a | py-b |                               |
| L+4 | -0.218      | 4p               |    | 18   | 14   | 39   |      |      | $\pi^*$ (ph-a+ph-b+ph-c)      |
| L+3 | -0.898      |                  |    |      |      |      | 69   |      | $\pi^*$ (py-a)                |
| L+2 | -1.333      |                  |    |      | 18   |      | 11   | 41   | $\pi^*$ (ph-b+py-a+py-b)      |
| L+1 | -1.769      |                  |    | 24   |      |      |      | 45   | $\pi^*$ (ph-a+py-b)           |
| L   | -1.796      | 3d/4p            |    | 15   |      |      | 54   |      | $\pi^*$ (ph-a+py-a)           |
| H   | -5.116      | 10d              | 23 |      | 47   |      |      |      | d(Pt)+p(O)+ $\pi$ (ph-b)      |
| H-1 | -5.769      | 21d              |    | 38   | 13   |      |      | 15   | d(Pt)+ $\pi$ (ph-a+ph-b+py-b) |
| H-2 | -6.150      | 33d              |    | 20   |      |      |      | 16   | d(Pt)+ $\pi$ (ph-a+py-b)      |
| H-3 | -6.313      | 12d              |    | 10   | 38   |      |      |      | d(Pt)+ $\pi$ (ph-a+ph-b)      |
| H-4 | -6.340      | 71d/21s          |    |      |      |      |      |      | d(Pt)+s(Pt)                   |
| H-5 | -6.476      | 25d              | 31 | 9    |      |      |      |      | d(Pt)+p(O)                    |
| H-6 | -6.531      |                  | 4  |      |      |      | 79   |      | $\pi$ (ph-c)                  |
| H-7 | -6.640      | 5d               |    | 10   | 20   | 41   |      |      | $\pi$ (ph-a+ph-b+ph-c)        |

**Table S4** Molecular orbital compositions in the ground state for **2** at the DFT/B3LYP level

| MO  | Energy<br>(eV) | Contribution (%) |    |      |      |      |      |      | Assign                        |
|-----|----------------|------------------|----|------|------|------|------|------|-------------------------------|
|     |                | Pt               | O  | ph-a | ph-b | ph-c | py-a | py-b |                               |
| L+4 | -0.218         | 4p               |    | 13   | 13   | 45   |      |      | $\pi^*$ (ph-a+ph-b+ph-c)      |
| L+3 | -0.899         |                  |    |      |      |      | 69   |      | $\pi^*$ (py-a)                |
| L+2 | -1.306         |                  |    |      | 11   |      | 18   | 44   | $\pi^*$ (ph-b+py-a+py-b)      |
| L+1 | -1.769         |                  |    | 31   |      |      | 9    | 39   | $\pi^*$ (ph-a+py-b)           |
| L   | -1.796         | 3d/4p            |    | 7    |      |      | 48   | 15   | $\pi^*$ (py-a+py-b)           |
| H   | -5.089         | 11d              | 22 |      | 44   |      |      |      | d(Pt)+p(O)+ $\pi$ (ph-b)      |
| H-1 | -5.687         | 19d              |    | 38   | 16   |      |      | 13   | d(Pt)+ $\pi$ (ph-a+ph-b+py-b) |
| H-2 | -6.123         | 28d              |    | 27   |      |      |      | 17   | d(Pt)+ $\pi$ (ph-a+py-b)      |
| H-3 | -6.286         | 14d              |    | 9    | 38   |      |      | 11   | d(Pt)+ $\pi$ (ph-b+py-b)      |
| H-4 | -6.340         | 73d/21s          |    |      |      |      |      |      | d(Pt)+s(Pt)                   |
| H-5 | -6.449         | 28d              | 34 |      |      |      |      |      | d(Pt)+p(O)                    |
| H-6 | -6.504         |                  |    |      |      | 84   |      |      | $\pi$ (ph-c)                  |
| H-7 | -6.612         | 4d               |    | 10   | 21   | 42   |      |      | $\pi$ (ph-a+ph-b+ph-c)        |

**Table S5** Molecular orbital compositions in the ground state for **3** at the DFT/B3LYP level

| MO  | Energy (eV) | Contribution (%) |    |      |      |      |      |      | Assign                        |
|-----|-------------|------------------|----|------|------|------|------|------|-------------------------------|
|     |             | Pt               | O  | ph-a | ph-b | ph-c | py-a | py-b |                               |
| L+4 | -0.190      |                  |    |      |      | 78   |      |      | $\pi^*$ (ph-c)                |
| L+3 | -0.706      |                  |    |      |      |      | 64   |      | $\pi^*$ (py-a)                |
| L+2 | -1.252      |                  |    |      | 17   |      | 10   | 40   | $\pi^*$ (ph-b+py-a+py-b)      |
| L+1 | -1.660      |                  |    | 26   |      |      | 45   |      | $\pi^*$ (ph-a+py-a)           |
| L   | -1.769      | 3p               |    | 9    |      |      |      | 54   | $\pi^*$ (py-b)                |
| H   | -5.116      | 11d              | 23 |      | 46   |      |      |      | d(Pt)+p(O)+ $\pi$ (ph-b)      |
| H-1 | -5.714      | 20d              |    | 35   | 15   |      |      | 12   | d(Pt)+ $\pi$ (ph-a+ph-b+py-b) |
| H-2 | -6.068      | 16d              |    | 35   |      |      | 15   | 11   | d(Pt)+ $\pi$ (ph-a+py-a+py-b) |
| H-3 | -6.231      | 26d              | 5  |      | 20   |      |      | 11   | d(Pt)+ $\pi$ (ph-b+py-b)      |
| H-4 | -6.286      | 73d/21s          |    |      |      |      |      |      | d(Pt)+s(Pt)                   |
| H-5 | -6.395      | 29d              | 32 |      |      |      |      |      | d(Pt)+p(O)                    |
| H-6 | -6.504      |                  |    |      |      | 86   |      |      | $\pi$ (ph-c)                  |
| H-7 | -6.558      | 5d               |    | 8    | 35   | 25   |      |      | $\pi$ (ph-b+ph-c)             |

**Table S6** Molecular orbital compositions (%) in the first triplet excited state for three complexes **1-3** at the TD-DFT/B3LYP level

|          | MO  | Energy (ev) | Contribution (%) |    |      |      |      |      | Assign              |
|----------|-----|-------------|------------------|----|------|------|------|------|---------------------|
|          |     |             | Pt               | O  | ph-a | ph-b | ph-c | py-a |                     |
| <b>1</b> | L+1 | -1.85       |                  |    | 27   |      |      | 53   | $\pi^*$ (ph-a+py-a) |
|          | H   | -4.87       | 3                | 22 |      | 60   |      |      | p(O)+ $\pi$ (ph-b)  |
| <b>2</b> | L+1 | -1.82       |                  |    | 27   |      |      | 53   | $\pi^*$ (ph-a+py-a) |
|          | H   | -4.87       | 4                | 22 |      | 59   |      |      | p(O)+ $\pi$ (ph-b)  |
| <b>3</b> | L+1 | -1.69       |                  |    | 28   |      |      | 47   | $\pi^*$ (ph-a,py-a) |
|          | L   | -2.07       |                  |    |      |      | 15   | 54   | $\pi^*$ (ph-c+py-b) |
|          | H   | -4.84       | 4                | 22 |      | 60   |      |      | p(O)+ $\pi$ (ph-b)  |
|          | H-1 | -5.74       | 28               |    | 40   |      |      |      | d(Pt)+ $\pi$ (ph-a) |

H-2

-6.07

31

17

15

d(Pt)+ $\pi$ (ph-a+py-b)

---
